# Supplementary material for: Facile synthesis of an accordion-like Ni-MOF superstructure for high-performance flexible supercapacitors
Source: Royal Society of Chemistry journal article supplement (doi:10.1039/c6ta08331e), 2016-01-01
Supplement: c6ta08331e1.pdf [file c6ta08331e1.pdf]

## Supplementary Information

### **Facile synthesis of accordion-like Ni-MOF superstructure for high-performance flexible supercapacitors**

*Yan Yan,<sup>a</sup> Peng Gu,<sup>a</sup> Shasha Zheng,<sup>a,b</sup> Mingbo Zheng,<sup>a</sup> Huan Pang<sup>\*a</sup> and Huaiguo Xue<sup>\*a</sup>*

*<sup>a</sup>College of Chemistry and Chemical Engineering, Yangzhou University, Yangzhou, 225002, China*

*<sup>b</sup>College of Chemistry and Chemical Engineering, Anyang Normal University, Anyang, 455002, P.*

*R. China*

*\*Email: [huanpangchem@hotmail.com](mailto:huanpangchem@hotmail.com); [panghuan@yzu.edu.cn](mailto:panghuan@yzu.edu.cn); [chhgxue@yzu.edu.cn](mailto:chhgxue@yzu.edu.cn)*

### Calculations:

The specific capacitance of the electrode material can be calculated from the charge-discharge curves according to the equation:

$$C = Q / (m \times \Delta V) = \int I dt / (m \times \Delta V) = I \times t_{\text{discharge}} / (m \times \Delta V) \quad (1)$$

Where  $m$  is the weight of the electrode materials,  $I$  is the discharge current,  $t_{\text{discharge}}$  is discharge time,  $\Delta V$  is the potential drop during discharge (excluding the  $IR$  drop).

The area-specific capacitance ( $C$ ) of the device can be calculated using

$$C = Q / (A \times \Delta V) = \int I dt / (A \times \Delta V) = I \times t_{\text{discharge}} / (A \times \Delta V) \quad (2)$$

Where  $A$  is the surface area of the device,  $I$  is the discharge current,  $t_{\text{discharge}}$  is discharge time,  $\Delta V$  is the potential drop during discharge (excluding the  $IR$  drop).

The energy density and power density of the device can be obtained from :

$$E = 0.5 C \times V^2 \quad (3)$$

$$P = E / t_{\text{discharge}} \quad (4)$$

Where  $V$  represents the operating voltage.

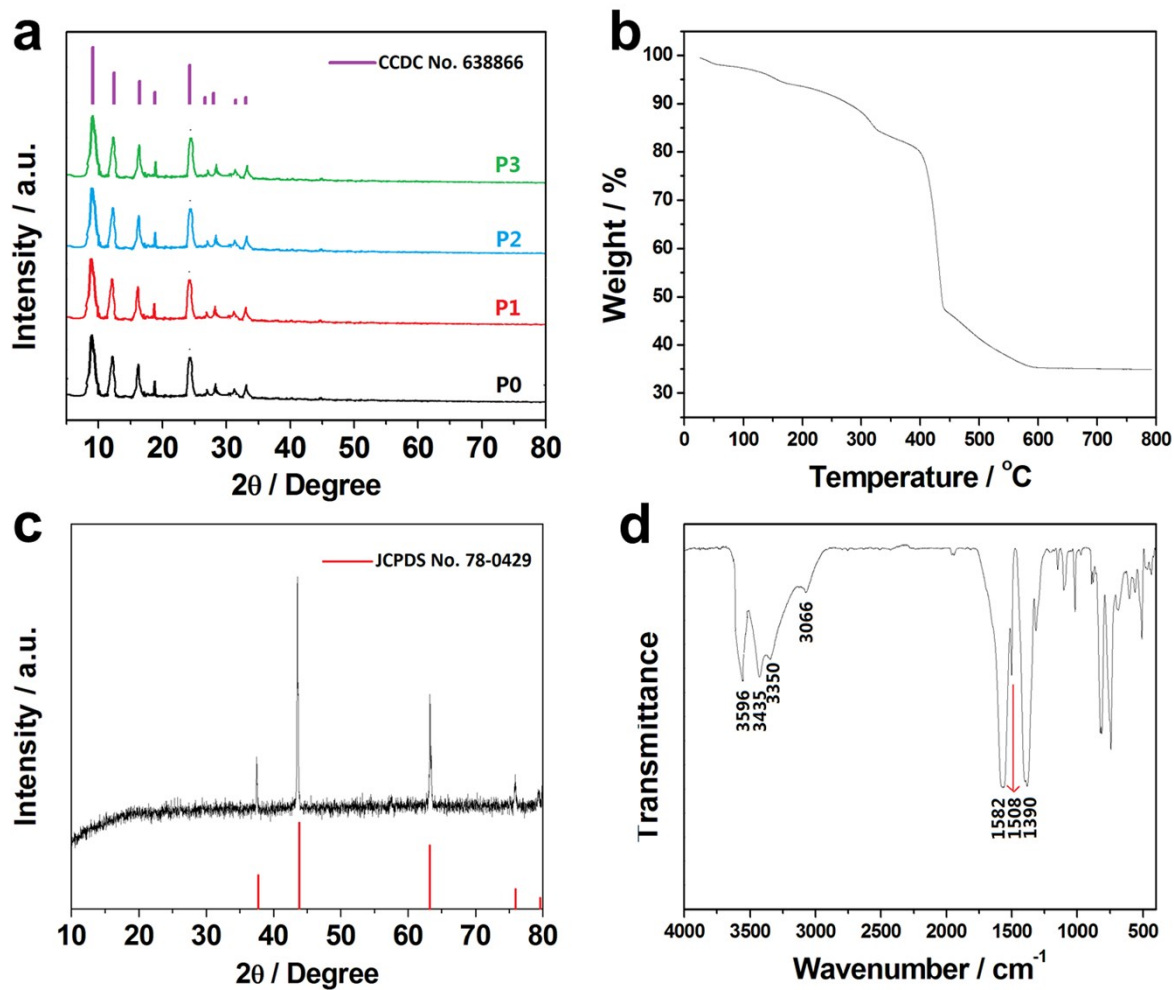

**Figure S1.** (a) XRD patterns of the products (P0–P3) obtained from different ultrasonic time (0min, 20min, 40min and 1h) of the bulk Ni-MOF, (b) TG curve of accordion-like Ni-MOF (P3); (c) XRD pattern of the samples obtained after the calcination at 800  $^{\circ}\text{C}$  for 2h in air, and (d) IR spectrum of as-prepared accordion-like Ni-MOF (P3).

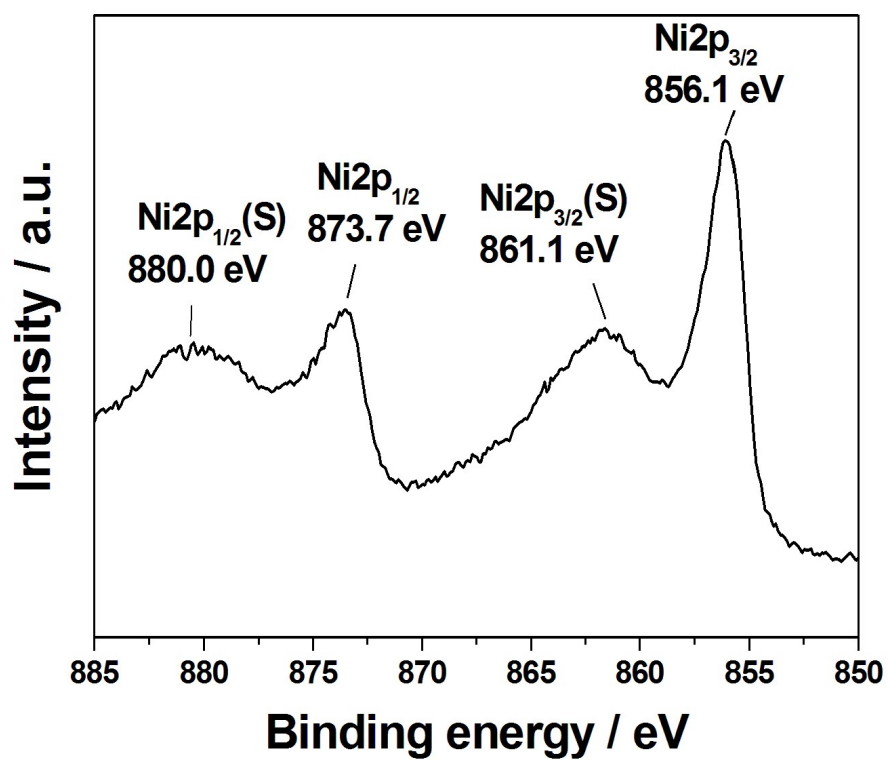

**Figure S2.** Ni 2p XPS spectra of as-prepared accordion-like Ni-MOF (P3).

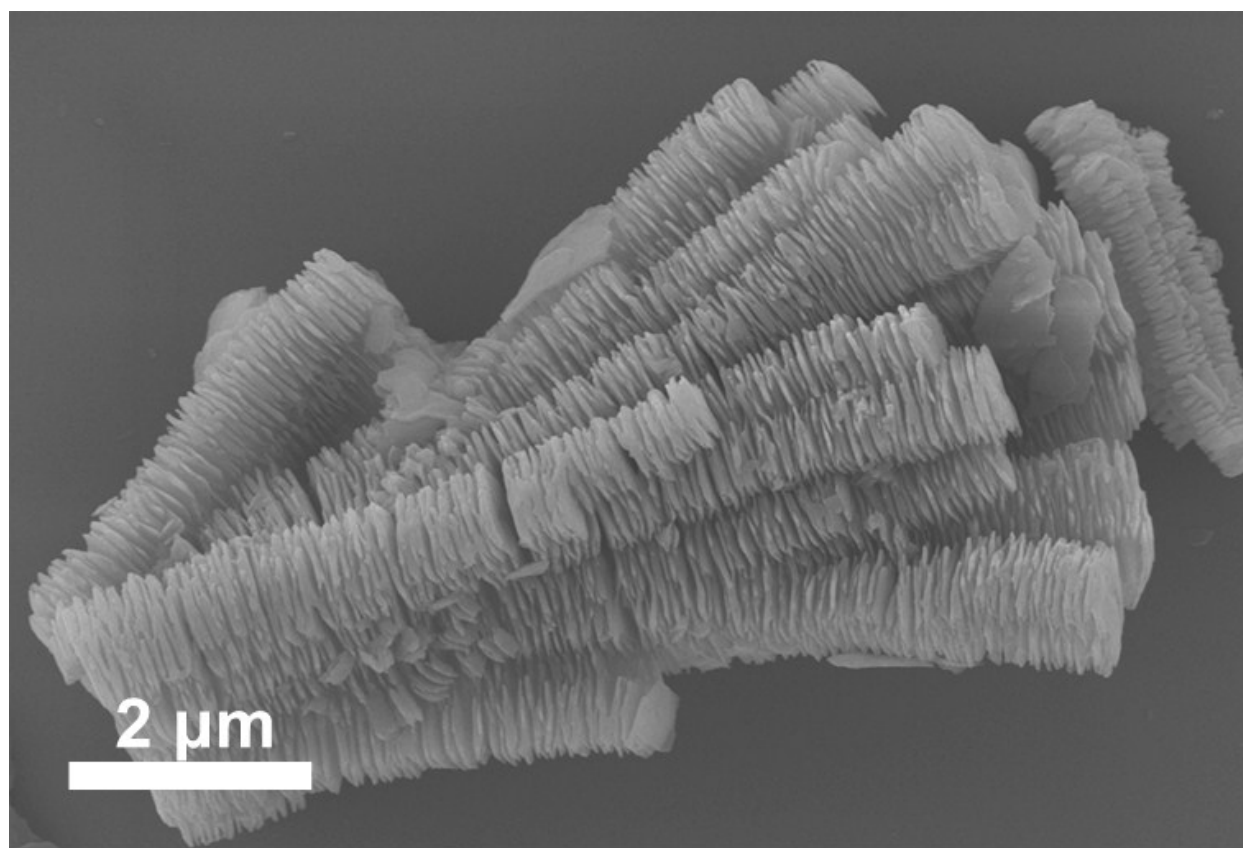

**Figure S3.** Large scale FESEM image of the accordion-like Ni-MOF (P3).

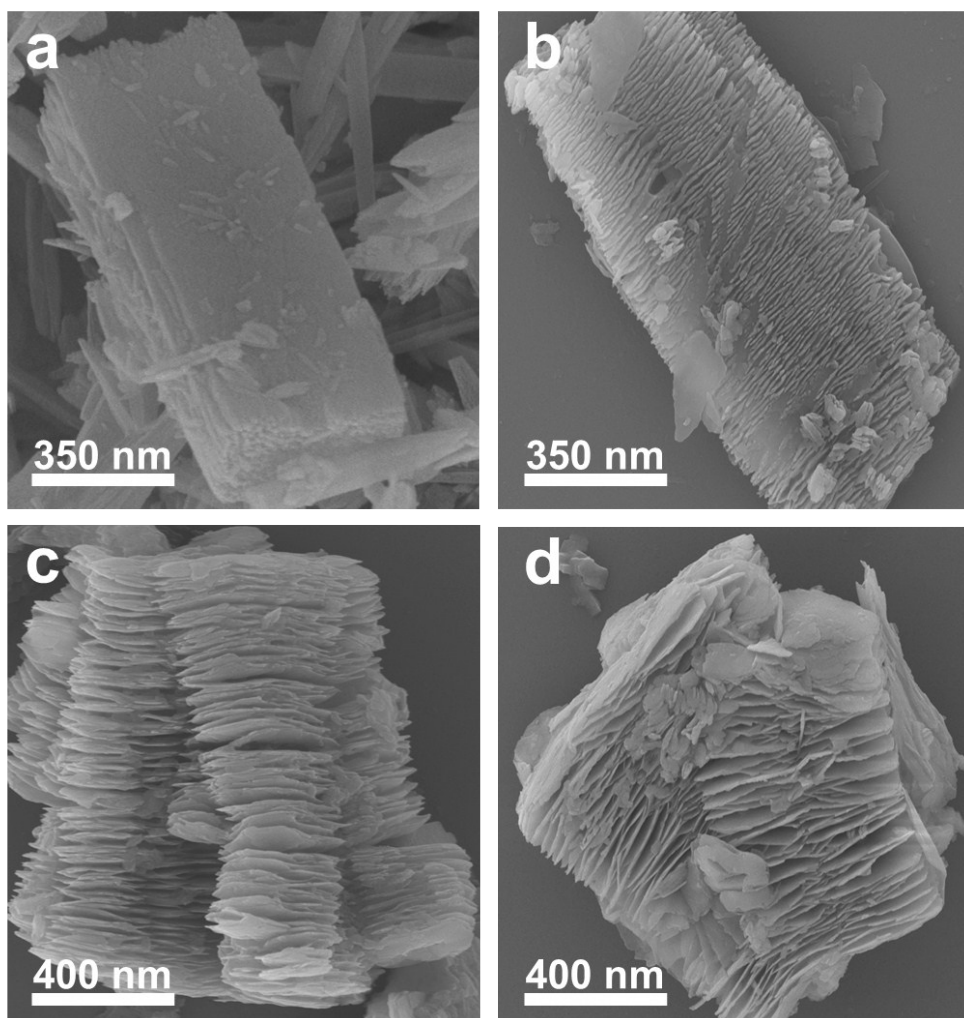

**Figure S4.** FESEM image of the products (P0–P3) obtained from different ultrasonic time (0min, 20min, 40min and 1h) of the bulk Ni-MOF.

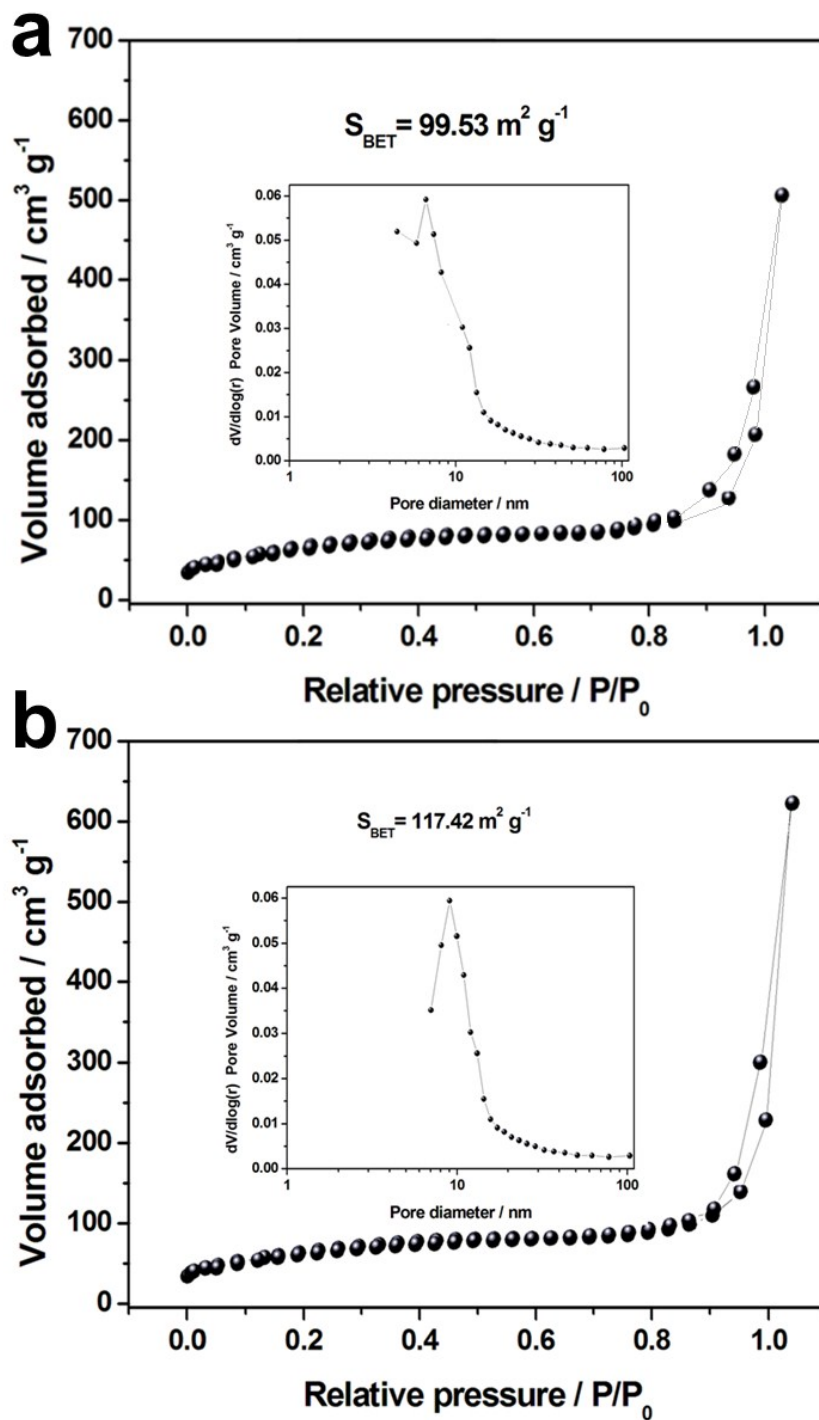

**Figure S5.**  $N_2$  adsorption-desorption isotherms and the pore size distribution curves for (a) bulk Ni-MOF (P0) and (b) accordion-like Ni-MOF (P3).

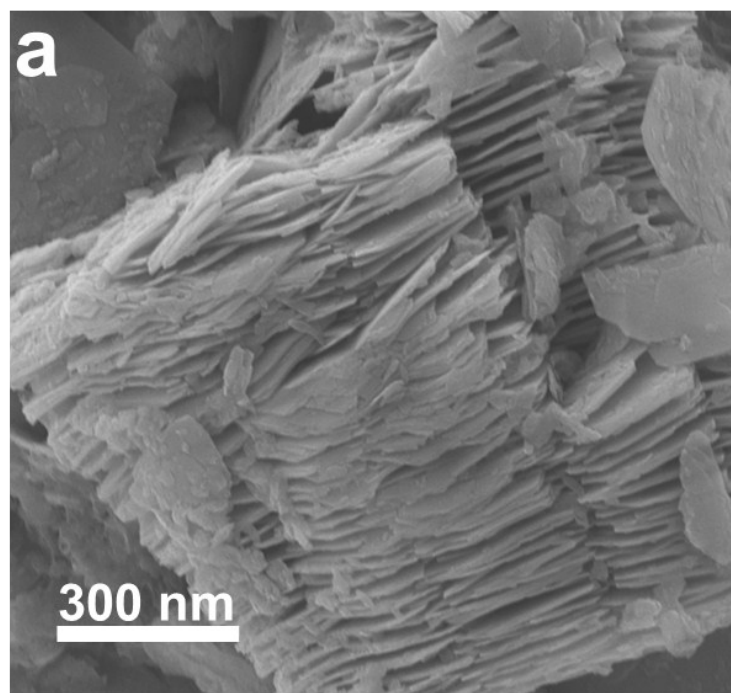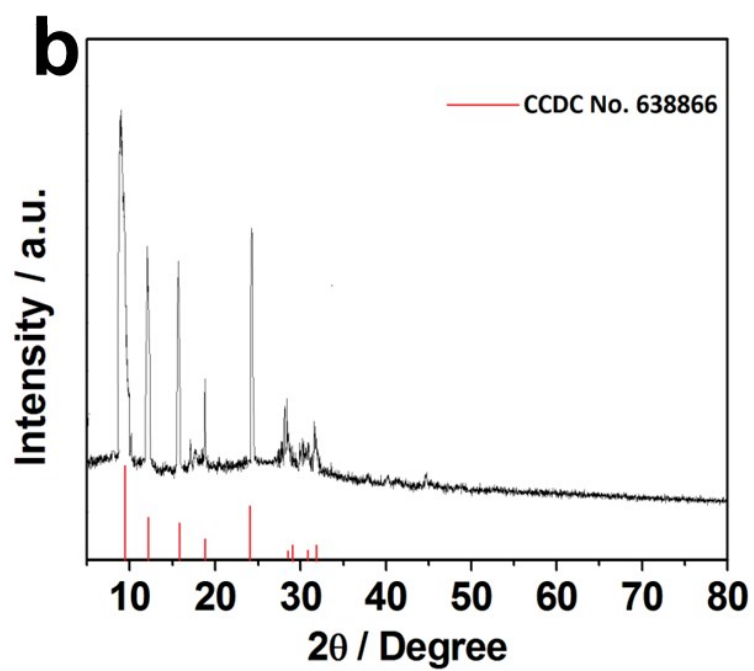

**Figure S6.** The SEM image (a) and XRD pattern (b) of the samples (P3) obtained after the 5000 cycle life testing.



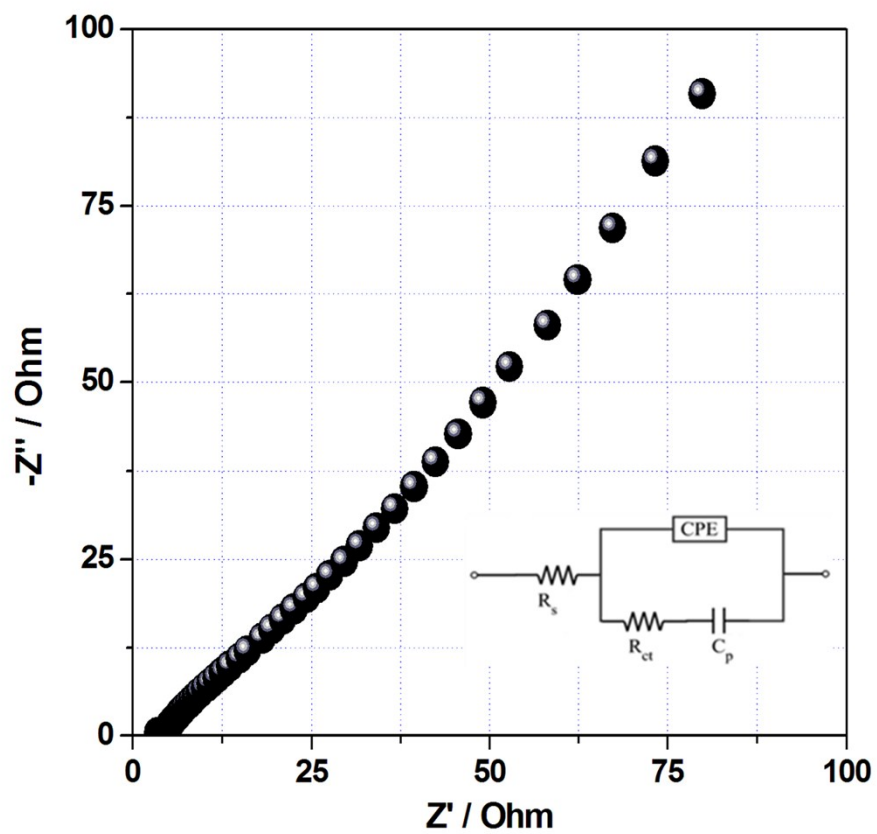

**Figure S7.** The electrochemical impedance spectra (EIS) of the as-prepared accordion-like Ni-MOF (P3) electrode at room temperature, and the equivalent circuit for the electrochemical impedance spectrum (Inset).

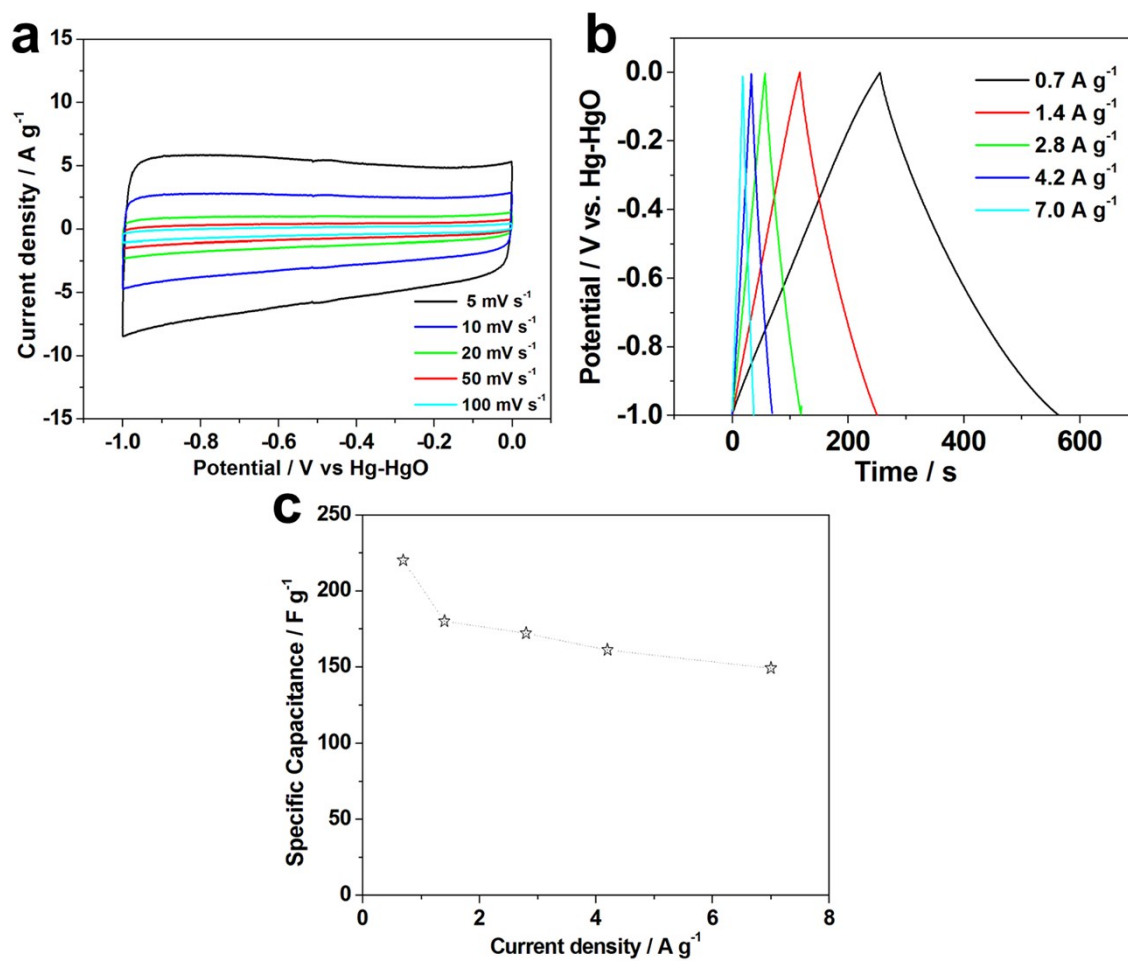

**Figure S8.** Activated carbon electrode in 3.0 M KOH solution: (a) CV curves with different scan rates; (b) CP curves with different current densities; (c) Specific capacitance calculated based on the discharge curve.

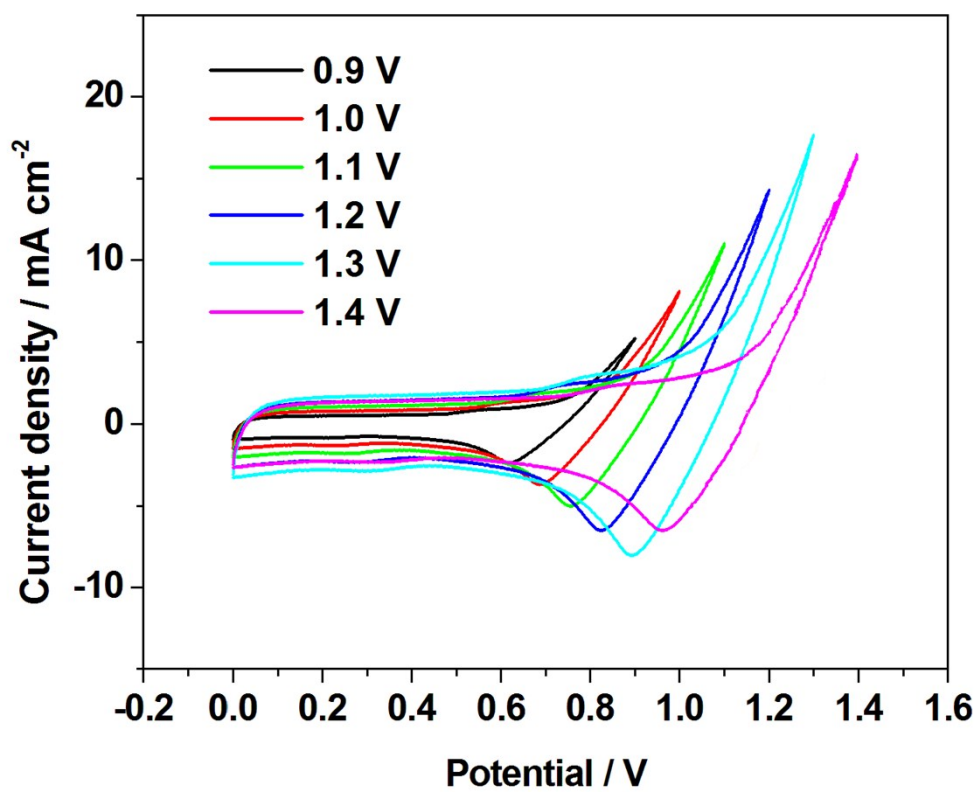

**Figure S9.** CV curves of the flexible solid-state asymmetric supercapacitors (accordion-like Ni-MOF (P3)//activated carbons) with the increase of the potential.

**Table S1 Capacitance properties of some recently published Ni-based electrode materials**

| <b>Material</b>                                                         | Specific capacitance (F g <sup>-1</sup> )<br>(low current density/scan rate) | Specific capacitance (F g <sup>-1</sup> )<br>(high current density/scan rate) | Capacity retention (%)                       |
|-------------------------------------------------------------------------|------------------------------------------------------------------------------|-------------------------------------------------------------------------------|----------------------------------------------|
| <b>NiO nanoflowers<sup>1</sup></b>                                      | 1678.4 (0.625 A g <sup>-1</sup> )                                            | 856 (6.25 A g <sup>-1</sup> )                                                 | 99.7% (1000 cycles, 6.25 A g <sup>-1</sup> ) |
| <b>NiO nanowires<sup>2</sup></b>                                        | 180 (0.126 A g <sup>-1</sup> )                                               | —                                                                             | —                                            |
| <b>NiO nanofibers/Ni<sup>3</sup></b>                                    | 737 (2 A g <sup>-1</sup> )                                                   | 570 (40 A g <sup>-1</sup> )                                                   | ~100% (8000 cycles, 10 A g <sup>-1</sup> )   |
| <b>NiO/Ni<sup>4</sup></b>                                               | 905 (1 A g <sup>-1</sup> )                                                   | 380 (28.6 A g <sup>-1</sup> )                                                 | —                                            |
| <b>NiO film<sup>5</sup></b>                                             | 441 (2 A g <sup>-1</sup> )                                                   | 200 (20 A g <sup>-1</sup> )                                                   | —                                            |
| <b>NiO nanoparticles<sup>6</sup></b>                                    | 549 (1 mV s <sup>-1</sup> )                                                  | 236 (20 mV s <sup>-1</sup> )                                                  | 60.6% (1000 cycles, 2 A g <sup>-1</sup> )    |
| <b>NiCo<sub>2</sub>S<sub>4</sub> ball in ball<sup>7</sup></b>           | 1036 (1 A g <sup>-1</sup> )                                                  | 705 (20 A g <sup>-1</sup> )                                                   | 87% (2000 cycles, 5 A g <sup>-1</sup> )      |
| <b>Ni-based pillared MOF<sup>8</sup></b>                                | 552 (1 A g <sup>-1</sup> )                                                   | 438 (20 A g <sup>-1</sup> )                                                   | >98% (16000 cycles, 10 A g <sup>-1</sup> )   |
| <b>Ni<sub>3</sub>(btc)<sub>2</sub>·12H<sub>2</sub>O MOF<sup>9</sup></b> | 726 (1 A g <sup>-1</sup> )                                                   | 313.8 (5 A g <sup>-1</sup> )                                                  | 65% (5000 cycles, 1 A g <sup>-1</sup> )      |
| <b>Ni-based MOF nanorods<sup>10</sup></b>                               | 1698 (1 A g <sup>-1</sup> )                                                  | 838 (10 A g <sup>-1</sup> )                                                   | 94.8% (1000 cycles, 1 A g <sup>-1</sup> )    |
| <b>Accordion-like Ni-MOF(This work)</b>                                 | 1021 (0.7 A g <sup>-1</sup> )                                                | 823 (7 A g <sup>-1</sup> )                                                    | 96.5% (5000 cycles, 1.4 A g <sup>-1</sup> )  |

## References

- 1 H. Pang, Y. Shi, J. Du, Y. Ma, G. Li, J. Chen, J. Zhang, H. Zheng and B. Yuan, *Electrochim. Acta*, 2012, **85**, 256.
- 2 H. Pang, Q. Lu, Y. Li and F. Gao, *Chem. Commun.*, 2009, 7542.
- 3 M. Kundu and L. Liu, *Mater. Lett.*, 2015, **144**, 114.
- 4 Q. Lu, M. W. Lattanzi, Y. Chen, X. Kou, W. Li, X. Fan, K. M. Unruh, J. Chen and J. Q. Xiao, *Angew. Chem., Int. Ed.*, 2011, **50**, 6847.
- 5 Y. Zhang, X. Xia, J. Tu, Y. Mai, S. Shi, X. Wang and C. Gu, *J. Power Sources*, 2012, **199**, 413.
- 6 S. Jahromi, A. Pandikumar, B. Goh, Y. Lim, W. Basirun, H. Lim and N. Huang, *RSC Adv.*, 2015, **5**, 14010.
- 7 L. Shen, L. Yu, H. Wu, X. Yu, X. Zhang and X. W. Lou, *Nat. Commun.*, 2015, **6**, 6694.
- 8 C. Qu, Y. Jiao, B. Zhao, D. Chen, R. Zou, K. S. Walton and M. Liu, *Nano Energy*, 2016, **26**, 66.
- 9 L. Kang, S. Sun, L. Kong, J. Lang and Y. Luo, *Chin. Chem. Lett.*, 2014, **25**, 957.
- 10 J. Xu, C. Yang, Y. Xue, C. Wang, J. Cao and Z. Chen, *Electrochim. Acta*, 2016, **211**, 595.
